# Supplementary material for: Therapeutic antiviral T cells noncytopathically clear persistently infected microglia after conversion into antigen-presenting cells
Source: PubMed Central journal article supplement — J Exp Med. 2015 Jul 27;212(8):1153–69. doi: 10.1084/jem.20142047 (PMC4516789; doi:10.1084/jem.20142047), 2015-07-27
Supplement: supp_jem.20142047_JEM_20142047_sm.pdf [file supp_jem.20142047_JEM_20142047_sm.pdf]

## SUPPLEMENTAL MATERIAL

Herz et al., <http://www.jem.org/cgi/content/full/jem.20142047/DC1>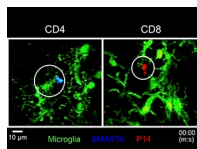

**Video 1. Antiviral T cell interactions with CD11c<sup>+</sup> microglia after adoptive immunotherapy.** The representative time lapses show virus-specific CD8<sup>+</sup> (P14) and CD4<sup>+</sup> (SMARTA) interacting with CD11c-YFP<sup>+</sup> microglia in the persistently infected brain parenchyma 12 d after adoptive immunotherapy. Note that CD8<sup>+</sup> T cell forms a stable interaction with the CD11c<sup>+</sup> cell, whereas the CD4<sup>+</sup> T cell remains in motion while interacting with its target. Interactions are highlighted with white circles. This video is shown at 15 frames/s.

**Table S1.** Q-PCR primer sequences used in this study

| Gene name      | Primer sequence                                                   | GenBank accession no. | Amplicon $T_m$ |
|----------------|-------------------------------------------------------------------|-----------------------|----------------|
|                |                                                                   |                       | °C             |
| <i>β-actin</i> | F: 5'-AGTCATTGTAGAAGGTGTGG-3'<br>R: 5'-GTGGGAATGGTCAGAAGG-3'      | NM_007393             | #              |
| <i>Cd11c</i>   | F: 5'-CTGGATAGCCTTTCTCTGCTG-3'<br>R: 5'-GCACACTGTGTCCGAACTC-3'    | NM_021334             | 60.4           |
| <i>Ccl2</i>    | F: 5'-GTCCTGTCTGCTTCTG-3'<br>R: 5'-GCTCTCCAGCCTACATTCATTG-3'      | NM_011333             | 62.0           |
| <i>Ccl3</i>    | F: 5'-GATTCCACGCCAATTCATCG-3'<br>R: 5'-TTCAGTTCAGGTCAGTGATG-3'    | NM_011337             | 62.0           |
| <i>Ccl4</i>    | F: 5'-AAACCTAACCCCGACCAAC-3'<br>R: 5'-CGGGAGGTGTAAGAGAAACA-3'     | NM_013652             | 60.4           |
| <i>Ccl5</i>    | F: 5'-GGGTACCATGAAGATCTCTGC-3'<br>R: 5'-TCTAGGGAGAGGTAGGCAAAG-3'  | NM_013653             | 58.0           |
| <i>Ccl7</i>    | F: 5'-GAAAACCCCAACTCCAAAGC-3'<br>R: 5'-CCTTAGGACCGTGATCAACAC-3'   | NM_013654             | 60.4           |
| <i>Cxcl1</i>   | F: 5'-AACCGAAGTCATAGCCACAC-3'<br>R: 5'-CAGACGGTGCCATCAGAG-3'      | NM_008176             | 57.9           |
| <i>Cxcl2</i>   | F: 5'-GAAGTCATAGCCACTCTCAAGG-3'<br>R: 5'-CTTCCGTTGAGGGACAGC-3'    | NM_009140             | 57.0           |
| <i>Cxcl9</i>   | F: 5'-AGTCCGCTGTTCTTTTCCTC-3'<br>R: 5'-TGAGGTCTTTGAGGGATTTGTAG-3' | NM_008599             | 60.4           |
| <i>Cxcl10</i>  | F: 5'-TCAGCACCATGAACCAA-3'<br>R: 5'-CTATGGCCCTCATTCTCACTG-3'      | NM_021274             | 60.4           |

This supplemental table provides the forward and reverse primer sequences used to quantify expression of the denoted chemoattractants.  $\beta$ -Actin served as a housekeeping control gene.  $T_m$ , melting temperature; #, reference gene.

Table S2, included in a separate Excel file, shows differential gene expression in CD11c<sup>+</sup> microglia after immunotherapy.
